# Supplementary material for: Short-Term and Long-Term Risk of Recurrent Vascular Event by Cause After Ischemic Stroke in Young Adults
Source: PubMed Central journal article supplement (PMC10879951; doi:10.1001/jamanetworkopen.2024.0054), 2024-02-20
Supplement: jamanetwopen-e240054-s001.pdf [file jamanetwopen-e240054-s001.pdf]

## Supplemental Online Content

Verburgt E, Hilkens NA, Ekker MS, et al. Short-term and long-term risk of recurrent vascular event by cause after ischemic stroke in young adults. *JAMA Netw Open*. 2024;7(2):e240054. doi:10.1001/jamanetworkopen.2024.0054

### **eAppendix:** Modified TOAST Classification

**eTable 1.** Diagnostic Work-Up in Cryptogenic Patients (n=302)

**eTable 2.** Distribution of Multiple Causes (n=57)

**eTable 3.** Cause of Stroke Based on the Modified TOAST Classification Stratified by Sex and Age

**eTable 4.** Use of Antithrombotic Treatment at Discharge and Time of Recurrent Event

This supplemental material has been provided by the authors to give readers additional information about their work.

## **eAppendix. Modified TOAST Classification**

1a. Atherothrombotic: Stroke patients with an ipsilateral internal carotid stenosis  $\geq 50\%$ , or an ipsilateral stenosis  $\geq 50\%$  of another cervical or intracranial artery, or mobile thrombus in the aortic arch.

1b. Likely atherothrombotic: Stroke patients with no evidence of atherothrombotic stroke as defined in criteria 1, with an ipsilateral internal carotid stenosis  $< 50\%$ , or an ipsilateral stenosis  $< 50\%$  of another cervical or intracranial artery, or aortic arch plaques  $\geq 4$  mm in thickness without a mobile component, or a history of myocardial infarction or coronary revascularization, or a history of documented peripheral arterial disease, or at least two risk factors for atherosclerotic disease: arterial hypertension (treated or known blood pressure before stroke  $\geq 140/90$  mm Hg or hypertensive retinopathy), diabetes mellitus (treated, or known blood fasting glucose  $\geq 7$  mmol/L), current smoking (or stopped smoking within the last 6 months) or high cholesterol (treated or known low-density lipoprotein before the stroke  $\geq 160$  mg/dl or 4.1 mmol/L).

2. Small vessel disease: Stroke patients with a small deep infarct measuring  $< 15$  mm on MRI (or CT) in the territory corresponding to symptoms, in a patient presenting a clinical syndrome compatible with a small deep infarct.

3. Cardioembolic: Stroke patients with at least one cardiac source for an embolus.

4a. Rare cause: Stroke patients who had another etiology.

4b. Cervical artery dissection: Stroke patients who had a carotid- or vertebral artery dissection.

5. Cryptogenic: Stroke patients who did not meet criteria for the groups defined above, maybe with incomplete evaluation.

6. Multiple: Patients with two or more etiologies defined in 1-4.

**eTable 1. Diagnostic Work-Up in Cryptogenic Patients (n=302)**

|                                                    | Number of patients (%) |
|----------------------------------------------------|------------------------|
| Complete work-up <sup>a</sup>                      | 232 (76.8)             |
| Imaging of the carotid arteries <sup>b</sup>       | 291 (96.4)             |
| Screening antiphospholipid antibodies <sup>c</sup> | 274 (90.7)             |
| Electrocardiogram <sup>d</sup>                     | 299 (99.0)             |
| Holter monitoring <sup>e</sup>                     | 272 (90.1)             |
| TTE or TEE <sup>f</sup>                            | 282 (93.4)             |

Abbreviation: TTE, transthoracic echocardiography; TEE, transesophageal echocardiography.

<sup>a</sup> Complete work-up was defined as all of the following diagnostics performed: imaging of the carotid arteries, antiphospholipid antibodies, electrocardiogram, minimum of 24 hours Holter monitoring and any echocardiography.

<sup>b</sup> Imaging of the carotid arteries was done through computer tomography angiography, magnetic resonance angiography or duplex. From the 11 patients who did not receive imaging of the carotid arteries, eight had an infarct in the posterior territory.

<sup>c</sup> Antiphospholipid antibodies was determined by screening anticardiolipin antibody of immunoglobulin G, lupus anticoagulants or beta 2 glycoprotein.

<sup>d</sup> For two patients, it was not known if they had received electrocardiogram monitoring.

<sup>e</sup> Holter monitoring was defined as a minimum of 24-hour monitoring. For three patients, it was not known if they had received Holter monitoring. 21 of the patients without Holter monitoring were included in the study before trials of patent foramen ovale closure in 2017.

<sup>f</sup> For three patients, it was not known if they had received TTE or TEE. 13 patients without TTE or TEE were included in the study before trials of patent foramen ovale closure in 2017.

**eTable 2. Distribution of Multiple Causes (n=57)**

|                         | Atherothrombotic | Likely atherothrombotic | Cardioembolic | Small vessel disease | Rare cause     |
|-------------------------|------------------|-------------------------|---------------|----------------------|----------------|
| Atherothrombotic        |                  |                         |               |                      |                |
| Likely atherothrombotic | 0                |                         |               |                      |                |
| Cardioembolic           | 2                | 12                      |               |                      |                |
| Small vessel disease    | 0                | 2                       | 1             |                      |                |
| Rare cause              | 6                | 18 <sup>a</sup>         | 9             | 6                    | 1 <sup>b</sup> |

Abbreviation: n, number

<sup>a</sup> One patient was diagnosed with three causes: three cardiovascular risk factors, cervical artery dissection and antiphospholipid syndrome.

<sup>b</sup> One patient was diagnosed with both cervical artery dissection and antiphospholipid syndrome.

**Table 3. Cause of Stroke Based on the Modified TOAST Classification Stratified by Sex and Age**

|                                       | Total     | Atherothrombotic | Likely<br>atherothrombotic | Small vessel<br>disease | Cardioembolic | Rare causes | Cervical<br>artery<br>dissection | Cryptogenic | Multiple<br>causes |
|---------------------------------------|-----------|------------------|----------------------------|-------------------------|---------------|-------------|----------------------------------|-------------|--------------------|
| <b>Sex (n(%)), p-value= &lt;0.001</b> |           |                  |                            |                         |               |             |                                  |             |                    |
| Men                                   | 632 (100) | 34 (5.4)         | 89 (14.1)                  | 104 (16.5)              | 108 (17.1)    | 47 (7.4)    | 83 (13.1)                        | 136 (21.5)  | 31 (4.9)           |
| Women                                 | 584 (100) | 18 (3.1)         | 77 (13.2)                  | 61 (10.4)               | 92 (15.8)     | 83 (14.2)   | 61 (10.4)                        | 166 (28.4)  | 26 (4.5)           |
| <b>Age (n(%)), p-value= &lt;0.001</b> |           |                  |                            |                         |               |             |                                  |             |                    |
| 18-29 years                           | 124 (100) | 1 (0.8)          | 4 (3.2)                    | 4 (3.2)                 | 41 (33.1)     | 19 (15.3)   | 17 (13.7)                        | 36 (29.0)   | 2 (1.6)            |
| 30-34 years                           | 92 (100)  | 1 (1.1)          | 8 (8.7)                    | 8 (8.7)                 | 17 (18.5)     | 19 (20.7)   | 12 (13.0)                        | 24 (26.1)   | 3 (3.3)            |
| 35-39 years                           | 154 (100) | 1 (0.6)          | 15 (9.7)                   | 16 (10.4)               | 25 (16.2)     | 21 (13.6)   | 21 (13.6)                        | 48 (31.2)   | 7 (4.5)            |
| 40-44 years                           | 296 (100) | 9 (3.0)          | 42 (14.2)                  | 45 (15.2)               | 44 (14.9)     | 31 (10.5)   | 31 (10.5)                        | 79 (26.7)   | 15 (5.1)           |
| 45-49 years                           | 550 (100) | 40 (7.3)         | 97 (17.6)                  | 92 (16.7)               | 73 (13.3)     | 40 (7.3)    | 63 (11.5)                        | 115 (20.9)  | 30 (5.5)           |

**Table 4. Use of Antithrombotic Treatment at Discharge and Time of Recurrent Event**

|                                          | N of patients | Missing   | Single antiplatelet | Dual antiplatelet | Anticoagulation <sup>a</sup> | Other antithrombotic treatment | No antithrombotic treatment | Not started yet at time of recurrent event |
|------------------------------------------|---------------|-----------|---------------------|-------------------|------------------------------|--------------------------------|-----------------------------|--------------------------------------------|
| <b>Discharge</b>                         |               |           |                     |                   |                              |                                |                             |                                            |
| Total (n(%))                             | 1216          | 3 (0.2)   | 894 (73.5)          | 224 (18.4)        | 64 (5.3)                     | 22 (1.8) <sup>b</sup>          | 9 (0.7)                     | NA                                         |
| TOAST classification (n(%))              |               |           |                     |                   |                              |                                |                             | NA                                         |
| Atherothrombotic                         | 52            | 1 (1.9)   | 42 (80.8)           | 9 (17.3)          | 0 (0)                        | 0 (0)                          | 0 (0)                       |                                            |
| Likely atherothrombotic                  | 166           | 0 (0)     | 138 (83.1)          | 23 (13.9)         | 3 (1.8)                      | 1 (0.6)                        | 1 (0.6)                     |                                            |
| Small vessel disease                     | 165           | 0 (0)     | 130 (78.8)          | 35 (21.2)         | 0 (0)                        | 0 (0)                          | 0 (0)                       |                                            |
| Cardioembolic                            | 200           | 0 (0)     | 121 (60.5)          | 37 (18.5)         | 32 (16.0)                    | 8 (4.0)                        | 2 (1)                       |                                            |
| Rare causes                              | 130           | 1 (0.8)   | 94 (72.3)           | 12 (9.2)          | 12 (9.2)                     | 6 (4.6)                        | 5 (3.8)                     |                                            |
| Cervical artery dissection               | 144           | 0 (0)     | 114 (79.2)          | 24 (16.7)         | 5 (3.5)                      | 1 (0.7)                        | 0 (0)                       |                                            |
| Cryptogenic                              | 302           | 1 (0.3)   | 218 (72.2)          | 74 (24.5)         | 7 (2.3)                      | 1 (0.3)                        | 1 (0.3)                     |                                            |
| Multiple causes                          | 57            | 0 (0)     | 37 (64.9)           | 10 (17.5)         | 5 (8.8)                      | 5 (8.8)                        | 0 (0)                       |                                            |
| <b>Time of recurrent event</b>           |               |           |                     |                   |                              |                                |                             |                                            |
| Total (n(%))                             | 137           | 15 (10.9) | 84 (68.9)           | 14 (11.5)         | 10 (8.2)                     | 0 (0)                          | 2 (1.6)                     | 12 (9.8)                                   |
| TOAST classification (n(%)) <sup>c</sup> |               |           |                     |                   |                              |                                |                             |                                            |
| Atherothrombotic                         | 11            | 0 (0)     | 10 (90.9)           | 1 (9.1)           | 0 (0)                        | 0 (0)                          | 0 (0)                       | 0 (0)                                      |
| Likely atherothrombotic                  | 19            | 3 (15.8)  | 12 (63.2)           | 2 (10.5)          | 0 (0)                        | 0 (0)                          | 0 (0)                       | 2 (10.5)                                   |
| Small vessel disease                     | 23            | 4 (17.4)  | 18 (78.3)           | 1 (4.3)           | 0 (0)                        | 0 (0)                          | 0 (0)                       | 0 (0)                                      |
| Cardioembolic                            | 20            | 0 (0)     | 11 (55.0)           | 1 (5.0)           | 6 (30.0)                     | 0 (0)                          | 1 (5.0)                     | 1 (5.0)                                    |
| Rare causes                              | 18            | 1 (5.6)   | 10 (55.6)           | 1 (5.6)           | 2 (11.1)                     | 0 (0)                          | 1 (5.6)                     | 3 (16.7)                                   |
| Cervical artery dissection               | 21            | 4 (19.0)  | 9 (42.9)            | 4 (19.0)          | 0 (0)                        | 0 (0)                          | 0 (0)                       | 4 (19.0)                                   |
| Cryptogenic                              | 17            | 2 (11.8)  | 11 (64.7)           | 3 (17.6)          | 1 (5.9)                      | 0 (0)                          | 0 (0)                       | 0 (0)                                      |
| Multiple causes                          | 8             | 1 (12.5)  | 3 (37.5)            | 1 (12.5)          | 1 (12.5)                     | 0 (0)                          | 0 (0)                       | 2 (25.0)                                   |

<sup>a</sup>Among 64 participants using oral anticoagulants at discharge, 26 were using direct oral anticoagulants (DOAC) and 38 were using vitamin K antagonists. Among 10 participants with a recurrent event on oral anticoagulants, 5 were using a DOAC and 5 were using vitamin K antagonists.

<sup>b</sup>Other antithrombotic treatments were a combination of antiplatelets and anticoagulation (n=11), low molecular weight heparin (n=10) and unknown which type of antithrombotic treatment (n=1).

<sup>c</sup>The TOAST classification regards the cause of stroke of the index event.
