# Supplementary material for: Short-Term and Long-Term Risk of Recurrent Vascular Event by Cause After Ischemic Stroke in Young Adults
Source: PubMed Central journal article supplement (PMC10879951; doi:10.1001/jamanetworkopen.2024.0054), 2024-02-20
Supplement: jamanetwopen-e240054-s002.pdf [file jamanetwopen-e240054-s002.pdf]

## Data Sharing Statement

Verburgt. Short-Term and Long-Term Risk of Recurrent Vascular Event by Cause After Ischemic Stroke in Young Adults. *JAMA Netw Open*. Published February 20, 2024. doi:10.1001/jamanetworkopen.2024.0054

### Data

**Data available:** Yes

**Data types:** Other (please specify)

**Additional Information:** Data is available upon request. Requests should be sent to the corresponding author for further information.

**How to access data:** Data is available upon request. Requests should be sent to the corresponding author for further information.

**When available:** With publication

### Supporting Documents

**Document types:** Other (please specify)

**Additional Information:** Data is available upon request. Requests should be sent to the corresponding author for further information.

**How to access documents:** Data is available upon request. Requests should be sent to the corresponding author for further information.

**When available:** With publication

### Additional Information

**Who can access the data:** Data is available upon request. Requests should be sent to the corresponding author for further information.

**Types of analyses:** Data is available upon request. Requests should be sent to the corresponding author for further information.

**Mechanisms of data availability:** Data is available upon request. Requests should be sent to the corresponding author for further information.

**Any additional restrictions:** Data is available upon request. Requests should be sent to the corresponding author for further information.
